# Supplementary material for: Defining Disease Phenotypes Using National Linked Electronic Health Records: A Case Study of Atrial Fibrillation
Source: PubMed Central journal article supplement (PMC4219705; doi:10.1371/journal.pone.0110900), 2014-11-04
Supplement: pone.0110900.s001.pdf [file pone.0110900.s001.pdf]

# Defining disease phenotypes using national linked electronic health records: a case study of atrial fibrillation

## Supporting Information

**Table S1.** Hazard ratio point estimates and 95% confidence intervals for selected risk factors and incident atrial fibrillation.

| Study                | Analysis <sup>d</sup> | Risk factors      |                  |                       |
|----------------------|-----------------------|-------------------|------------------|-----------------------|
|                      |                       | Heart failure     | Hypertension     | Myocardial infarction |
| CALIBER <sup>a</sup> | Primary care          | 2.07 (1.95-2.19)  | 1.74 (1.70-1.78) | 1.53 (1.46-1.60)      |
|                      | Secondary care        | 2.31 (2.21-2.43)  | 1.80 (1.76-1.84) | 1.75 (1.68-1.82)      |
|                      | Inferred              | N/A               | 1.72 (1.68-1.77) | 1.69 (1.61-1.77)      |
|                      | Combined              | 2.35 (2.25-2.46)  | 1.80 (1.77-1.84) | 1.70 (1.64-1.76)      |
| FHS <sup>b</sup>     |                       | 3.20 (1.99-5.16)  | 1.80 (1.48-2.18) | 1.44 (1.02-2.03)      |
| MDCS <sup>c</sup>    | Women                 | 8.70 (3.60-20.94) | 1.74 (1.42-2.13) | 1.84 (1.26-2.69)      |
|                      | Men                   | 4.53 (2.34-8.75)  | 1.78 (1.48-2.14) | 2.03 (1.65-2.49)      |

<sup>a</sup>Clinical disease research using Linked Bespoke studies and Electronic Records.

<sup>b</sup>Framingham Heart Study; Schnabel *et al.* (2009) *Lancet* 373:739-45.

<sup>c</sup>The Malmö Diet and Cancer Study; Smith *et al.* (2010) *Eur J Epidemiol* 25:95-102.

<sup>d</sup>Indicates the type of analysis. For CALIBER, this is the data used to define the incident AF diagnosis; for MDCS these are subgroups.
